# Supplementary material for: The Impact of COVID-19-Related Mitigation Measures on the Health and Fitness Status of Primary School Children in Austria: A Longitudinal Study with Data from 708 Children Measured before and during the Ongoing COVID-19 Pandemic
Source: MDPI journal article supplement (doi:10.3390/sports10030043), 2022-03-11
Supplement: s1 [file s1]

**The impact of COVID-19 related mitigation measures on the health and fitness status of primary school children in Austria: A longitudinal study with data from 708 children measured before and during the ongoing COVID-19 pandemic.**

**Supplementary material**

Gerald Jarnig, Reinhold Kerbl and Mireille N.M. van Poppel

This supplementary material has been provided by the authors to give readers additional information about their work.

**Table S1.** Restriction levels for children in Austria from January 31, 2020 to June 30, 2021 in relation to the OxCGRT stringency index.

**Table S2.** Detailed description of the restrictions for Austrian children in primary school from January 31, 2020 to June 30, 2021 in relation to the OxCGRT stringency index.

**Table S3.** Overall sample characteristics study population vs. loss at follow-up.

**Table S4.** Additional sample characteristics for anthropometrics for subgroups sex and school location.

**Table S5.** Additional sample characteristics for fitness tests for subgroups sex, school location and school grade.

**Table S6.** Post hoc tests for EQUI BMI<sub>AUT</sub> for the main effect time and interactions for time × sex and time × school location based on the estimated marginal means.

**Table S7.** Post hoc tests for waist-to-height ratio for the main effect time and interactions for time × sex and time × school location based on the estimated marginal means.

**Table S8.** Post hoc tests for fitness tests for the main effect time and interactions for time × sex, time × school location, and time × school grade based on the estimated marginal means.

**Table S9.** Friedman test for weight classification and estimation of health risk using cut-offs described in AUT FIT to baseline measurements T1 and follow-up measurements T2, T3, T4, and T5.

**Table S10.** Post hoc analyses by the Wilcoxon test for weight classifications using Austrian cut-offs.

**Table S11.** Post hoc analyses by the Wilcoxon test for estimation of health risk using cut-offs described in AUT FIT.

**Table S12.** Overview of fitness test STA9 classifications in relation to the results of international reference values.

**Table S13.** Friedman test for fitness performance categories using cut-offs described in AUT FIT in relation to baseline measurements T1 and follow-up measurements T3 and T5.

**Table S14.** Post hoc analyses by the Wilcoxon test for fitness tests using cut-offs described in AUT FIT.

**Figure S1.** COVID-19 restrictions in Austria between January 31, 2020 and June 30, 2021.

**Figure S1A.** Restriction levels for primary school children.

**Figure S1B.** OxCGRT Stringency Index.

**Table S1.** Restriction levels for children in Austria from January 31, 2020 to June 30, 2021 in relation to the OxCGRT Stringency Index.

| Period                  | OxCGRT Austria | School Structure | Physical Education In school | Sports and Leisure Facilities | Sport at the Club | Stay at Home Requirements | Sum of Restrictions in the School |
|-------------------------|----------------|------------------|------------------------------|-------------------------------|-------------------|---------------------------|-----------------------------------|
| 01-31-2020 – 02-23-2020 | 0.00           | 0                | 0                            | 0                             | 0                 | 0                         | 0                                 |
| 02-24-2020 – 03-08-2020 | 11.11          | 0                | 0                            | 0                             | 0                 | 0                         | 0                                 |
| 03-09-2020 – 03-11-2020 | 19.44          | 0                | 0                            | 0                             | 0                 | 0                         | 0                                 |
| 03-12-2020              | 34.26          | 0                | 0                            | 0                             | 0                 | 0                         | 0                                 |
| 03-13-2020 – 03-15-2020 | 48.15          | 0                | 0                            | 0                             | 0                 | 0                         | 0                                 |
| 03-16-2020 – 04-13-2020 | 81.48          | 3                | 3                            | 3                             | 3                 | 3                         | 15                                |
| 04-14-2020 – 04-22-2020 | 77.78          | 3                | 3                            | 3                             | 3                 | 3                         | 15                                |
| 04-23-2020 – 04-30-2020 | 75.00          | 3                | 3                            | 3                             | 3                 | 3                         | 15                                |
| 05-01-2020              | 67.59          | 3                | 3                            | 2                             | 3                 | 2                         | 13                                |
| 05-02-2020 – 05-10-2020 | 64.81          | 3                | 3                            | 2                             | 3                 | 2                         | 13                                |
| 05-11-2020 – 05-17-2020 | 59.26          | 3                | 3                            | 2                             | 3                 | 2                         | 13                                |
| 05-18-2020 – 05-28-2020 | 59.26          | 2                | 3                            | 2                             | 3                 | 2                         | 12                                |
| 05-29-2020 – 06-02-2020 | 53.70          | 2                | 3                            | 2                             | 2                 | 2                         | 11                                |
| 06-03-2020              | 50.00          | 2                | 3                            | 2                             | 2                 | 2                         | 11                                |
| 06-04-2020 – 07-01-2020 | 47.22          | 2                | 3                            | 2                             | 2                 | 2                         | 11                                |
| 07-02-2020 – 07-09-2020 | 47.22          | 2                | 3                            | 0                             | 1                 | 0                         | 6                                 |
| 07-10-2020 – 09-05-2020 | 35.19          | 0                | 0                            | 0                             | 1                 | 0                         | 1                                 |
| 09-06-2020 – 09-13-2020 | 36.11          | 0                | 0                            | 0                             | 1                 | 0                         | 1                                 |
| 09-14-2020 – 09-16-2020 | 36.11          | 1                | 0                            | 0                             | 1                 | 1                         | 3                                 |
| 09-17-2020 – 09-28-2020 | 37.04          | 1                | 0                            | 0                             | 1                 | 1                         | 3                                 |
| 09-29-2020 – 10-12-2020 | 40.74          | 1                | 0                            | 0                             | 1                 | 1                         | 3                                 |
| 10-13-2020 – 10-16-2020 | 44.91          | 1                | 0                            | 0                             | 1                 | 2                         | 4                                 |
| 10-17-2020 – 10-22-2020 | 58.80          | 1                | 0                            | 0                             | 1                 | 2                         | 4                                 |
| 10-23-2020              | 60.19          | 1                | 0                            | 0                             | 1                 | 2                         | 4                                 |
| 10-24-2020 – 10-26-2020 | 60.19          | 0                | 0                            | 1                             | 3                 | 2                         | 6                                 |
| 10-27-2020 – 11-01-2020 | 64.81          | 0                | 0                            | 1                             | 3                 | 2                         | 6                                 |
| 11-02-2020              | 75.00          | 0                | 0                            | 1                             | 3                 | 2                         | 6                                 |
| 11-03-2020 – 11-16-2020 | 75.00          | 0                | 2                            | 1                             | 3                 | 2                         | 8                                 |
| 11-17-2020 – 12-06-2020 | 82.41          | 3                | 3                            | 1                             | 3                 | 2                         | 12                                |
| 12-07-2020 – 12-23-2020 | 71.30          | 1                | 2                            | 1                             | 3                 | 1                         | 8                                 |
| 12-24-2020 – 12-25-2020 | 82.41          | 3                | 3                            | 1                             | 3                 | 2                         | 12                                |
| 12-26-2020 – 01-06-2021 | 82.41          | 3                | 3                            | 1                             | 3                 | 2                         | 12                                |
| 01-07-2021 – 01-18-2021 | 82.41          | 3                | 3                            | 1                             | 3                 | 2                         | 12                                |
| 01-19-2021 – 02-05-2021 | 82.41          | 2                | 2                            | 1                             | 3                 | 1                         | 9                                 |
| 02-06-2021 – 02-07-2021 | 82.41          | 3                | 3                            | 1                             | 3                 | 1                         | 11                                |
| 02-08-2021 – 02-11-2021 | 74.07          | 3                | 3                            | 1                             | 3                 | 1                         | 11                                |
| 02-12-2021 – 02-14-2021 | 79.63          | 3                | 3                            | 1                             | 3                 | 1                         | 11                                |
| 02-15-2021 – 03-14-2021 | 75.93          | 1                | 2                            | 1                             | 3                 | 1                         | 8                                 |
| 03-15-2021 – 03-31-2021 | 73.15          | 1                | 2                            | 1                             | 2                 | 1                         | 7                                 |

|                         |       |   |   |   |   |   |   |
|-------------------------|-------|---|---|---|---|---|---|
| 04-01-2021 – 04-05-2021 | 75.00 | 1 | 2 | 1 | 2 | 1 | 7 |
| 04-06-2021 – 04-25-2021 | 78.70 | 1 | 1 | 1 | 2 | 1 | 6 |
| 04-26-2021 – 05-02-2021 | 76.85 | 1 | 1 | 1 | 2 | 1 | 6 |
| 05-03-2021 – 05-10-2021 | 75.00 | 1 | 1 | 1 | 2 | 1 | 6 |
| 05-11-2021 – 05-15-2021 | 73.15 | 1 | 1 | 1 | 2 | 1 | 6 |
| 05-16-2021 – 05-18-2021 | 65.74 | 1 | 1 | 1 | 2 | 1 | 6 |
| 05-19-2021 – 06-09-2021 | 68.52 | 1 | 0 | 0 | 1 | 0 | 2 |
| 06-10-2021 – 06-30-2021 | 60.19 | 1 | 0 | 0 | 1 | 0 | 2 |

Level 0 = no restrictions, Level 1 = low restrictions, Level 2 = medium restrictions, Level 3 = high restrictions, OxCGRT = Oxford COVID-19 Government Response Tracker Stringency Index.

**Table S2.** Detailed description of the restrictions for Austrian children in primary school from January 31, 2020 to June 30, 2021 in relation to the OxCGRT Stringency Index.

| Period                  | OxCGRT Austria | School structure | Physical education in school | Sports and leisure facilities | Sport at the club | Stay at home requirements |
|-------------------------|----------------|------------------|------------------------------|-------------------------------|-------------------|---------------------------|
| 01-31-2020 – 02-23-2020 | 0.00           | A                | A                            | A                             | A                 | A                         |
| 02-24-2020 – 03-08-2020 | 11.11          | A                | A                            | A                             | A                 | A                         |
| 03-09-2020 – 03-11-2020 | 19.44          | A                | A                            | A                             | A                 | A                         |
| 03-12-2020              | 34.26          | A                | A                            | A                             | A                 | A                         |
| 03-13-2020 – 03-15-2020 | 48.15          | A                | A                            | A                             | A                 | A                         |
| 03-16-2020 – 04-13-2020 | 81.48          | B                | D                            | E                             | G                 | I                         |
| 04-14-2020 – 04-22-2020 | 77.78          | B                | D                            | E                             | G                 | I                         |
| 04-23-2020 – 04-30-2020 | 75.00          | B                | D                            | E                             | G                 | I                         |
| 05-01-2020              | 67.59          | B                | D                            | F                             | G                 | J                         |
| 05-02-2020 – 05-10-2020 | 64.81          | B                | D                            | F                             | G                 | J                         |
| 05-11-2020 – 05-17-2020 | 59.26          | B                | D                            | F                             | G                 | J                         |
| 05-18-2020 – 05-28-2020 | 59.26          | C                | D                            | F                             | G                 | J                         |
| 05-29-2020 – 06-02-2020 | 53.70          | C                | D                            | F                             | H                 | J                         |
| 06-03-2020              | 50.00          | C                | D                            | F                             | H                 | J                         |
| 06-04-2020 – 07-01-2020 | 47.22          | C                | D                            | F                             | H                 | J                         |
| 07-02-2020 – 07-09-2020 | 47.22          | C                | D                            | A                             | L                 | A                         |
| 07-10-2020 – 09-05-2020 | 35.19          | K                | K                            | A                             | L                 | A                         |
| 09-06-2020 – 09-13-2020 | 36.11          | K                | K                            | A                             | L                 | A                         |
| 09-14-2020 – 09-16-2020 | 36.11          | M                | A                            | A                             | L                 | J                         |
| 09-17-2020 – 09-28-2020 | 37.04          | M                | A                            | A                             | L                 | J                         |
| 09-29-2020 – 10-12-2020 | 40.74          | M                | A                            | A                             | L                 | J                         |
| 10-13-2020 – 10-16-2020 | 44.91          | M                | A                            | A                             | L                 | O                         |
| 10-17-2020 – 10-22-2020 | 58.80          | M                | A                            | A                             | L                 | O                         |
| 10-23-2020              | 60.19          | M                | A                            | A                             | L                 | O                         |
| 10-24-2020 – 10-26-2020 | 60.19          | K                | K                            | F                             | G                 | O                         |
| 10-27-2020 – 11-01-2020 | 64.81          | K                | K                            | F                             | G                 | O                         |
| 11-02-2020              | 75.00          | K                | K                            | F                             | G                 | O                         |
| 11-03-2020 – 11-16-2020 | 75.00          | M                | N                            | F                             | G                 | O                         |
| 11-17-2020 – 12-06-2020 | 82.41          | B                | D                            | F                             | G                 | O                         |
| 12-07-2020 – 12-23-2020 | 71.30          | M                | N                            | F                             | G                 | J                         |
| 12-24-2020 – 12-25-2020 | 82.41          | K                | K                            | F                             | G                 | O                         |
| 12-26-2020 – 01-06-2021 | 82.41          | K                | K                            | F                             | G                 | O                         |
| 01-07-2021 – 01-18-2021 | 82.41          | B                | D                            | F                             | G                 | O                         |
| 01-19-2021 – 02-05-2021 | 82.41          | C                | N                            | F                             | G                 | J                         |

|                         |       |   |   |   |   |   |
|-------------------------|-------|---|---|---|---|---|
| 02-06-2021 – 02-07-2021 | 82.41 | K | K | F | G | J |
| 02-08-2021 – 02-11-2021 | 74.07 | K | K | F | G | J |
| 02-12-2021 – 02-14-2021 | 79.63 | K | K | F | G | J |
| 02-15-2021 – 03-14-2021 | 75.93 | M | N | F | G | J |
| 03-15-2021 – 03-31-2021 | 73.15 | M | N | F | H | J |
| 04-01-2021 – 04-05-2021 | 75.00 | M | N | F | H | J |
| 04-06-2021 – 04-25-2021 | 78.70 | M | N | F | H | J |
| 04-26-2021 – 05-02-2021 | 76.85 | M | N | F | H | J |
| 05-03-2021 – 05-10-2021 | 75.00 | M | N | F | H | J |
| 05-11-2021 – 05-15-2021 | 73.15 | M | N | F | H | J |
| 05-16-2021 – 05-18-2021 | 65.74 | M | N | F | H | J |
| 05-19-2021 – 06-09-2021 | 68.52 | M | A | A | L | A |
| 06-10-2021 – 06-30-2021 | 60.19 | M | A | A | L | A |

OxCGRT = Oxford COVID-19 Government Response Tracker Stringency Index, A = no restrictions, B = distance learning in primary school, C = lessons in primary school in shifts/home schooling are possible and recommended, D = no physical education in school, E = closures of all public playgrounds and sports facilities, F = public playgrounds and sports grounds are reopened, minimum distance must be maintained, G = club sport is forbidden, H = club sport is possible under severe restrictions and conditions, I = required with exceptions, J = restricted freedom of movement/keeping a minimum distance; K = holidays, L = practice of club sports is allowed under submission of prevention concepts, M = ordinary lessons in primary school/home schooling possible, N = limited sports activities in elementary school, O = recommended to stay at home.

**Table S3.** Overall sample characteristics study population vs. loss at follow-up.

| Variable                        | Study population | loss at follow-up | X <sup>2</sup> | t                  | p-lvl | p-Value           |
|---------------------------------|------------------|-------------------|----------------|--------------------|-------|-------------------|
| <b>Age (years)</b>              | 8.3 (0.7)        | 8.3 (0.7)         |                | 1.725              |       | 0.09              |
| <b>Female Sex</b>               | 349 (49.4%)      | 69 (60.0%)        | 4.418          |                    | *     | 0.036             |
| <b>Urban region</b>             | 423 (59.9%)      | 61 (53.0%)        | 1.914          |                    |       | 0.17              |
| <b>SY 19-20—grade 2</b>         | 344 (48.7%)      | 67 (58.3%)        | 3.596          |                    |       | 0.06              |
| <b>EQUI BMI<sub>AUT</sub></b>   | 22.30 (3.51)     | 21.79 (3.27)      |                | 1.449              |       | 0.15              |
| <b>WHtR</b>                     | 0.461 (0.520)    | 0.456 (0.48)      |                | 0.965              |       | 0.34              |
| <b>6MR SDS (DüMo)</b>           | 0.49 (1.12)      | 0.24 (1.13)       |                | 2.252              | *     | 0.025             |
| <b>SLJ SDS (DüMo)</b>           | 0.18 (1.06)      | -0.01 (1.11)      |                | 1.726              |       | 0.09              |
| <b>MB1kg z-value (KATS-K)</b>   | 0.07 (0.95)      | -0.12 (1.21)      |                | 1.561 <sup>a</sup> |       | 0.12 <sup>a</sup> |
| <b>4-m × 10-m SHR SDS (MCA)</b> | -0.38 (0.92)     | -0.70 (1.01)      |                | 3.476              | **    | 0.001             |

Data are *n* (%) or mean (SD); sample size for study population, *n* = 708 for anthropometrics and *n* = 706 for motor fitness; for loss at follow up, *n* = 115 for anthropometrics and *n* = 117 for motor fitness, a = equal variances not assumed, X<sup>2</sup> = chi-square test value; t = test statistic *t*-test, p-lvl (*p*-value level) \* = *p* < 0.05, \*\* = *p* < 0.01, \*\*\* = *p* < 0.001; BMI = body mass index, SY 19-20—grade 2 = children visiting in school year 2019/20 grade 2 of primary school, EQUI BMI<sub>AUT</sub> = equivalent BMI based on Austrian reference centile curves passing through adult BMI values [1], AUT weight classification = based on Austrian reference centile curves passing through adult BMI values [1], WHtR = waist-to-height ratio, SD = standard deviation; 6MR = 6 minute run, SLJ = standing long jump, MB1kg = medicine ball throw (1 kilogram), 4 × 10 SHR = 4-m × 10-m shuttle run, m = meter, SDS = standard deviation score, z-value = traditional z-score standardization; DüMo = Düsseldorfer Modell [2], KATS-K = Karlsruher test system [3], MCA = Motor Competence Assessment [4].

**Table S4.** Additional sample characteristics for anthropometrics for subgroups' sex and school location.

| Variable                                  | Subgroup      | Categories     | Sep-19     | Jun-20     | Sep-20     | Mar-21     | Jun-21     |
|-------------------------------------------|---------------|----------------|------------|------------|------------|------------|------------|
| <b>AUT weight classification, no. (%)</b> | Girls         | Underweight    | 20 (5.7)   | 19 (5.4)   | 20 (5.7)   | 22 (6.3)   | 22 (6.3)   |
|                                           |               | Normal weight  | 279 (79.7) | 269 (76.9) | 265 (75.7) | 262 (74.9) | 255 (72.9) |
|                                           |               | Overweight     | 38 (10.9)  | 51 (14.6)  | 49 (14.0)  | 50 (14.3)  | 58 (16.6)  |
|                                           |               | Obesity        | 11 (3.1)   | 8 (2.3)    | 13 (3.7)   | 13 (3.7)   | 11 (3.1)   |
|                                           |               | Morbid obesity | 2 (0.6)    | 3 (0.9)    | 3 (0.9)    | 3 (0.9)    | 4 (1.1)    |
|                                           | Boys          | Underweight    | 21 (5.9)   | 15 (4.2)   | 8 (2.2)    | 6 (1.7)    | 4 (1.1)    |
|                                           |               | Normal weight  | 281 (78.5) | 280 (78.2) | 278 (77.7) | 275 (76.8) | 277 (77.4) |
|                                           |               | Overweight     | 38 (10.6)  | 39 (10.9)  | 47 (13.1)  | 48 (13.4)  | 49 (13.7)  |
|                                           |               | Obesity        | 14 (3.9)   | 19 (5.3)   | 18 (5.0)   | 19 (5.3)   | 18 (5.0)   |
|                                           |               | Morbid obesity | 4 (1.1)    | 5 (1.4)    | 7 (2.0)    | 10 (2.8)   | 10 (2.8)   |
|                                           | Urban schools | Underweight    | 25 (5.9)   | 22 (5.2)   | 15 (3.5)   | 15 (3.5)   | 14 (3.3)   |
|                                           |               | Normal weight  | 332 (78.3) | 320 (75.5) | 320 (75.5) | 312 (73.6) | 309 (72.9) |
|                                           |               | Overweight     | 46 (10.8)  | 55 (13.0)  | 57 (13.4)  | 66 (15.6)  | 69 (16.3)  |
|                                           |               | Obesity        | 16 (3.8)   | 20 (4.7)   | 24 (5.7)   | 20 (4.7)   | 20 (4.7)   |
|                                           |               | Morbid obesity | 5 (1.2)    | 7 (1.7)    | 8 (1.9)    | 11 (2.6)   | 12 (2.8)   |
|                                           | Rural schools | Underweight    | 16 (5.6)   | 12 (4.2)   | 13 (4.6)   | 13 (4.6)   | 12 (4.2)   |
|                                           |               | Normal weight  | 228 (80.3) | 229 (80.6) | 223 (78.5) | 225 (79.2) | 223 (78.5) |
|                                           |               | Overweight     | 30 (10.6)  | 35 (12.3)  | 39 (13.7)  | 32 (11.3)  | 38 (13.4)  |
|                                           |               | Obesity        | 9 (3.2)    | 7 (2.5)    | 7 (2.5)    | 12 (4.2)   | 9 (3.2)    |
|                                           |               | Morbid obesity | 1 (0.4)    | 1 (0.4)    | 2 (0.7)    | 2 (0.7)    | 2 (0.7)    |
| <b>WHtR, health estimation, no. (%)</b>   | Girls         | No h.r.        | 271 (77.4) | 249 (71.1) | 291 (83.1) | 260 (74.3) | 308 (88.0) |
|                                           |               | Increased h.r. | 72 (20.6)  | 88 (25.1)  | 53 (15.1)  | 77 (22.0)  | 39 (11.1)  |
|                                           |               | High h.r.      | 7 (2.0)    | 13 (3.7)   | 6 (1.7)    | 13 (3.7)   | 3 (0.9)    |
|                                           | Boys          | No h.r.        | 313 (87.4) | 266 (74.3) | 302 (84.4) | 266 (74.3) | 315 (88.0) |
|                                           |               | Increased h.r. | 33 (9.2)   | 76 (21.2)  | 42 (11.7)  | 74 (20.7)  | 31 (8.7)   |
|                                           |               | High h.r.      | 12 (3.4)   | 16 (4.5)   | 14 (3.9)   | 18 (5.0)   | 12 (3.4)   |
|                                           | Urban schools | No h.r.        | 358 (84.4) | 300 (70.8) | 351 (82.8) | 301 (73.1) | 363 (85.6) |
|                                           |               | Increased h.r. | 53 (12.5)  | 101 (23.8) | 56 (13.2)  | 90 (21.2)  | 49 (11.6)  |
|                                           |               | High h.r.      | 13 (3.1)   | 23 (5.4)   | 17 (4.0)   | 24 (5.7)   | 12 (2.8)   |
|                                           | Rural schools | No h.r.        | 226 (79.6) | 215 (75.7) | 242 (85.2) | 216 (76.1) | 260 (91.5) |
|                                           |               | Increased h.r. | 52 (18.3)  | 63 (22.2)  | 39 (13.7)  | 61 (21.5)  | 21 (7.4)   |
|                                           |               | High h.r.      | 6 (2.1)    | 6 (2.1)    | 3 (1.1)    | 7 (2.5)    | 3 (1.1)    |

Data are No (%); EQUI BMI<sub>AUT</sub> = equivalent BMI based on Austrian reference centile curves passing through adult BMI values [1], AUT weight classification = based on Austrian reference centile curves passing through adult BMI values [1], Weight classification = Underweight = equivalent BMI = < 18.5, Normal weight = equivalent BMI = 18.5 to 25, Overweight = equivalent BMI = 25.0 to 30.0, Obesity = equivalent BMI = 30 to 35, Morbid obesity = equivalent BMI > 35; WHtR = waist-to-height ratio, h.r. = health risk, estimation of health risk: no health risk = WHtR < 0.5, increased health risk = WHtR 0.5 to < 0.6, high health risk = WHtR ≥ 0.6.

**Table S5.** Additional sample characteristics for Fitness tests for subgroups' sex, school location, and school grade.

| Variable                           | Subgroup                           | Sep-19       | Sep-20       | Jun-21       |
|------------------------------------|------------------------------------|--------------|--------------|--------------|
| <b>6MR, mean (SD), m</b>           | All ( <i>n</i> = 706)              | 918 (139)    | 814 (131)    | 861 (155)    |
|                                    | Girls ( <i>n</i> = 349)            | 874 (118)    | 776 (111)    | 807 (128)    |
|                                    | Boys ( <i>n</i> = 357)             | 960 (146)    | 850 (139)    | 913 (162)    |
|                                    | Urban schools ( <i>n</i> = 423)    | 918 (141)    | 816 (141)    | 868 (162)    |
|                                    | Rural school ( <i>n</i> = 283)     | 916 (137)    | 810 (115)    | 849 (145)    |
|                                    | SY 19-20—grade 2 ( <i>n</i> = 345) | 900 (134)    | 801 (126)    | 848 (153)    |
|                                    | SY 19-20—grade 3 ( <i>n</i> = 361) | 934 (142)    | 826 (135)    | 873 (157)    |
| <b>SLJ, mean (SD), cm</b>          | All ( <i>n</i> = 706)              | 125 (20)     | 135 (20)     | 138 (21)     |
|                                    | Girls ( <i>n</i> = 349)            | 119 (18)     | 130 (19)     | 133 (20)     |
|                                    | Boys ( <i>n</i> = 357)             | 130 (20)     | 139 (20)     | 143 (22)     |
|                                    | Urban schools ( <i>n</i> = 423)    | 125 (20)     | 134 (20)     | 138 (21)     |
|                                    | Rural school ( <i>n</i> = 283)     | 123 (21)     | 137 (19)     | 139 (21)     |
|                                    | SY 19-20—grade 2 ( <i>n</i> = 345) | 120 (18)     | 132 (19)     | 136 (20)     |
|                                    | SY 19-20—grade 3 ( <i>n</i> = 361) | 129 (21)     | 138 (20)     | 141 (22)     |
| <b>MB1kg, mean (SD), cm</b>        | All ( <i>n</i> = 706)              | 346 (72)     | 399 (73)     | 438 (78)     |
|                                    | Girls ( <i>n</i> = 349)            | 316 (59)     | 374 (66)     | 411 (71)     |
|                                    | Boys ( <i>n</i> = 357)             | 375 (72)     | 423 (71)     | 464 (76)     |
|                                    | Urban schools ( <i>n</i> = 423)    | 346 (74)     | 401 (73)     | 443 (80)     |
|                                    | Rural school ( <i>n</i> = 283)     | 346 (69)     | 396 (72)     | 431 (74)     |
|                                    | SY 19-20—grade 2 ( <i>n</i> = 345) | 318 (64)     | 376 (67)     | 414 (72)     |
|                                    | SY 19-20—grade 3 ( <i>n</i> = 361) | 373 (72)     | 421 (71)     | 462 (76)     |
| <b>4 x 10 SHR, mean (SD), sec.</b> | All ( <i>n</i> = 706)              | 14.90 (1.49) | 14.76 (1.53) | 13.49 (1.24) |
|                                    | Girls ( <i>n</i> = 349)            | 15.25 (1.47) | 15.02 (1.42) | 13.70 (1.17) |
|                                    | Boys ( <i>n</i> = 357)             | 14.57 (1.43) | 14.51 (1.60) | 13.29 (1.27) |
|                                    | Urban schools ( <i>n</i> = 423)    | 14.77 (1.42) | 14.88 (1.57) | 13.58 (1.32) |
|                                    | Rural school ( <i>n</i> = 283)     | 15.11 (1.57) | 14.58 (1.45) | 13.37 (1.09) |
|                                    | SY 19-20—grade 2 ( <i>n</i> = 345) | 15.28 (1.43) | 14.95 (1.53) | 13.67 (1.18) |
|                                    | SY 19-20—grade 3 ( <i>n</i> = 361) | 14.55 (1.45) | 14.58 (1.51) | 13.32 (1.27) |

Data are mean (SD); *n* = sample size for study population, SD = standard deviation; 6MR = 6 minute run, SLJ = standing long jump, MB1kg = medicine ball throw (1 kilogram), 4 x 10 SHR = 4 x 10-meter shuttle run, m = meter, cm = centimeter, sec. = seconds, SY 19-20—grade 2 = children visiting in school year 2019/20 grade 2 of primary school, SY 19-20—grade 3 = children visiting in school year 2019/20 grade 3 of primary school.

**Table S6.** Post hoc tests for EQUI BMI<sub>AUT</sub> for the main effect time and interactions for time  $\times$  sex and time  $\times$  school location based on the estimated marginal means.

| Variable                | Subgroups                             | Pairwise comparisons | Mean diff (95% CI)        | SE    | p-lvl | p-Value <sup>a</sup> |
|-------------------------|---------------------------------------|----------------------|---------------------------|-------|-------|----------------------|
| EQUI BMI <sub>AUT</sub> | Time                                  | T1 to T2             | -0.283 (-0.409 to -0.157) | 0.045 | ***   | <0.001               |
|                         |                                       | T1 to T3             | -0.403 (-0.537 to -0.268) | 0.048 | ***   | <0.001               |
|                         |                                       | T1 to T4             | -0.583 (-0.733 to -0.433) | 0.053 | ***   | <0.001               |
|                         |                                       | T1 to T5             | -0.636 (-0.793 to -0.480) | 0.056 | ***   | <0.001               |
|                         |                                       | T2 to T3             | -0.120 (-0.228 to -0.012) | 0.038 | ***   | <0.001               |
|                         |                                       | T2 to T4             | -0.300 (-0.424 to -0.177) | 0.044 | ***   | <0.001               |
|                         |                                       | T2 to T5             | -0.353 (-0.486 to -0.220) | 0.047 | ***   | <0.001               |
|                         |                                       | T3 to T4             | -0.181 (-0.280 to -0.081) | 0.035 | ***   | <0.001               |
|                         |                                       | T3 to T5             | -0.234 (-0.348 to -0.120) | 0.041 | ***   | <0.001               |
|                         |                                       | T4 to T5             | -0.053 (-0.128 to -0.021) | 0.027 |       | 0.45                 |
|                         | Time $\times$ Sex (Girls)             | T1 to T2             | -0.140 (-0.317 to 0.037)  | 0.063 |       | 0.26                 |
|                         |                                       | T1 to T3             | -0.247 (-0.436 to -0.058) | 0.067 | **    | 0.003                |
|                         |                                       | T1 to T4             | -0.269 (-0.480 to -0.059) | 0.075 | **    | 0.003                |
|                         |                                       | T1 to T5             | -0.366 (-0.586 to -0.147) | 0.078 | ***   | <0.001               |
|                         |                                       | T2 to T3             | -0.107 (-0.258 to -0.045) | 0.054 |       | 0.48                 |
|                         |                                       | T2 to T4             | -0.129 (-0.302 to -0.044) | 0.061 |       | 0.36                 |
|                         |                                       | T2 to T5             | -0.226 (-0.412 to -0.040) | 0.066 | **    | 0.007                |
|                         |                                       | T3 to T4             | -0.023 (-0.162 to 0.117)  | 0.049 |       | >0.99                |
|                         |                                       | T3 to T5             | -0.119 (-0.279 to 0.041)  | 0.057 |       | 0.36                 |
|                         |                                       | T4 to T5             | -0.097 (-0.201 to 0.008)  | 0.037 |       | 0.10                 |
|                         | Time $\times$ Sex (Boys)              | T1 to T2             | -0.425 (-0.606 to -0.245) | 0.064 | ***   | <0.001               |
|                         |                                       | T1 to T3             | -0.558 (-0.751 to -0.366) | 0.068 | ***   | <0.001               |
|                         |                                       | T1 to T4             | -0.897 (-1.111 to -0.682) | 0.076 | ***   | <0.001               |
|                         |                                       | T1 to T5             | -0.906 (-1.130 to -0.683) | 0.079 | ***   | <0.001               |
|                         |                                       | T2 to T3             | -0.133 (-0.287 to 0.021)  | 0.055 |       | 0.16                 |
|                         |                                       | T2 to T4             | -0.471 (-0.647 to -0.295) | 0.063 | ***   | <0.001               |
|                         |                                       | T2 to T5             | -0.481 (-0.671 to -0.291) | 0.067 | ***   | <0.001               |
|                         |                                       | T3 to T4             | -0.338 (-0.480 to -0.197) | 0.050 | ***   | <0.001               |
|                         |                                       | T3 to T5             | -0.348 (-0.511 to -0.185) | 0.058 | ***   | <0.001               |
|                         |                                       | T4 to T5             | -0.010 (-0.116 to 0.097)  | 0.038 |       | >0.99                |
|                         | Time $\times$ School Location (Urban) | T1 to T2             | -0.350 (-0.510 to -0.190) | 0.057 | ***   | <0.001               |
|                         |                                       | T1 to T3             | -0.514 (-0.685 to -0.343) | 0.061 | ***   | <0.001               |
|                         |                                       | T1 to T4             | -0.810 (-1.001 to -0.620) | 0.068 | ***   | <0.001               |
|                         |                                       | T1 to T5             | -0.834 (-1.032 to -0.636) | 0.070 | ***   | <0.001               |
|                         |                                       | T2 to T3             | -0.164 (-0.301 to -0.027) | 0.049 | **    | 0.008                |
|                         |                                       | T2 to T4             | -0.460 (-0.617 to -0.304) | 0.056 | ***   | <0.001               |
|                         |                                       | T2 to T5             | -0.484 (-0.652 to -0.315) | 0.060 | ***   | <0.001               |
|                         |                                       | T3 to T4             | -0.296 (-0.422 to -0.170) | 0.045 | ***   | <0.001               |
|                         |                                       | T3 to T5             | -0.320 (-0.464 to -0.175) | 0.051 | ***   | <0.001               |
|                         |                                       | T4 to T5             | -0.024 (-0.118 to 0.071)  | 0.034 |       | >0.99                |
|                         |                                       | T1 to T2             | -0.215 (-0.411 to -0.020) | 0.069 | *     | 0.020                |
|                         |                                       | T1 to T3             | -0.291 (-0.499 to -0.082) | 0.074 | **    | 0.001                |

|                                   |          |                           |       |     |        |
|-----------------------------------|----------|---------------------------|-------|-----|--------|
| Time × School Location<br>(Rural) | T1 to T4 | −0.356 (−0.588 to −0.123) | 0.083 | *** | <0.001 |
|                                   | T1 to T5 | −0.438 (−0.681 to −0.196) | 0.086 | *** | <0.001 |
|                                   | T2 to T3 | −0.075 (−0.243 to 0.092)  | 0.059 |     | >0.99  |
|                                   | T2 to T4 | −0.140 (−0.331 to 0.051)  | 0.068 |     | 0.39   |
|                                   | T2 to T5 | −0.223 (−0.429 to −0.017) | 0.073 | *   | 0.023  |
|                                   | T3 to T4 | −0.065 (−0.219 to 0.089)  | 0.055 |     | >0.99  |
|                                   | T3 to T5 | −0.148 (−0.324 to 0.029)  | 0.063 |     | 0.19   |
|                                   | T4 to T5 | −0.083 (−0.198 to 0.033)  | 0.041 |     | 0.44   |

a = adjusted for multiple comparisons using Bonferroni correction. p-lvl (*p*-value level) \* =  $p < 0.05$ , \*\* =  $p < 0.01$ , \*\*\* =  $p < 0.001$ , BMI = body mass index, CI = confidence interval, EQUI BMI<sub>AUT</sub> = equivalent BMI based on Austrian reference centile curves passing through adult BMI values [1], Mean diff = mean difference based on the estimated marginal means, p-lvl = significance level, SDS = standard deviation score, SE = standard error, T1 = baseline measurements in September 2019, T2 = follow-up measurements in June 2020, T3 = follow-up measurements in September 2020, T4 = follow-up measurements in Mar 2021, T5 = follow-up measurements in June 2021.

**Table S7.** Post hoc tests for waist-to-height ratio for the main effect time and interactions for time × sex and time × school location based on the estimated marginal means.

| Variable | Subgroups             | Pairwise comparisons | Mean diff (95% CI)        | SE    | p-lvl | p-Value <sup>a</sup> |
|----------|-----------------------|----------------------|---------------------------|-------|-------|----------------------|
| WHtR     | Time                  | T1 to T2             | −0.016 (−0.020 to −0.013) | 0.001 | ***   | <0.001               |
|          |                       | T1 to T3             | 0.012 (0.009 to 0.016)    | 0.001 | ***   | <0.001               |
|          |                       | T1 to T4             | −0.009 (−0.013 to −0.005) | 0.001 | ***   | <0.001               |
|          |                       | T1 to T5             | 0.029 (0.025 to 0.033)    | 0.001 | ***   | <0.001               |
|          |                       | T2 to T3             | 0.029 (0.025 to 0.033)    | 0.001 | ***   | <0.001               |
|          |                       | T2 to T4             | 0.007 (0.004 to 0.011)    | 0.001 | ***   | <0.001               |
|          |                       | T2 to T5             | 0.045 (0.042 to 0.049)    | 0.001 | ***   | <0.001               |
|          |                       | T3 to T4             | −0.022 (−0.025 to −0.018) | 0.001 | ***   | <0.001               |
|          |                       | T3 to T5             | 0.016 (0.013 to 0.020)    | 0.001 | ***   | <0.001               |
|          |                       | T4 to T5             | 0.038 (0.035 to 0.041)    | 0.001 | ***   | <0.001               |
|          | Time × Sex<br>(Girls) | T1 to T2             | −0.015 (−0.021 to −0.010) | 0.002 | ***   | <0.001               |
|          |                       | T1 to T3             | 0.016 (0.011 to 0.021)    | 0.002 | ***   | <0.001               |
|          |                       | T1 to T4             | −0.004 (−0.010 to 0.001)  | 0.002 |       | 0.27                 |
|          |                       | T1 to T5             | 0.036 (0.031 to 0.041)    | 0.002 | ***   | <0.001               |
|          |                       | T2 to T3             | 0.031 (0.026 to 0.036)    | 0.002 | ***   | <0.001               |
|          |                       | T2 to T4             | 0.011 (0.006 to 0.016)    | 0.002 | ***   | <0.001               |
|          |                       | T2 to T5             | 0.051 (0.046 to 0.056)    | 0.002 | ***   | <0.001               |
|          |                       | T3 to T4             | −0.020 (−0.025 to −0.015) | 0.002 | ***   | <0.001               |
|          |                       | T3 to T5             | 0.020 (0.015 to 0.025)    | 0.002 | ***   | <0.001               |
|          |                       | T4 to T5             | 0.040 (0.036 to 0.045)    | 0.002 | ***   | <0.001               |
|          | Time × Sex<br>(Boys)  | T1 to T2             | −0.018 (−0.024 to −0.012) | 0.002 | ***   | <0.001               |
|          |                       | T1 to T3             | 0.009 (0.004 to 0.014)    | 0.002 | ***   | <0.001               |
|          |                       | T1 to T4             | −0.014 (−0.020 to −0.009) | 0.002 | ***   | <0.001               |
|          |                       | T1 to T5             | 0.022 (0.016 to 0.027)    | 0.002 | ***   | <0.001               |
|          |                       | T2 to T3             | 0.027 (0.022 to 0.032)    | 0.002 | ***   | <0.001               |
|          |                       | T2 to T4             | 0.004 (−0.001 to 0.009)   | 0.002 |       | 0.32                 |
|          |                       | T2 to T5             | 0.039 (0.034 to 0.045)    | 0.002 | ***   | <0.001               |
|          |                       | T3 to T4             | −0.023 (−0.028 to −0.018) | 0.002 | ***   | <0.001               |
|          |                       | T3 to T5             | 0.012 (0.007 to 0.017)    | 0.002 | ***   | <0.001               |
|          |                       | T4 to T5             | 0.036 (0.031 to 0.040)    | 0.002 | ***   | <0.001               |
|          |                       | T1 to T2             | −0.027 (−0.032 to −0.022) | 0.002 | ***   | <0.001               |
|          |                       | T1 to T3             | 0.002 (−0.002 to 0.007)   | 0.002 |       | >0.99                |

|                                |          |                           |       |     |        |
|--------------------------------|----------|---------------------------|-------|-----|--------|
| Time × School Location (Urban) | T1 to T4 | −0.020 (−0.025 to −0.016) | 0.002 | *** | <0.001 |
|                                | T1 to T5 | 0.018 (0.013 to 0.023)    | 0.002 | *** | <0.001 |
|                                | T2 to T3 | 0.029 (0.025 to 0.034)    | 0.002 | *** | <0.001 |
|                                | T2 to T4 | 0.006 (0.002 to 0.011)    | 0.002 | **  | 0.001  |
|                                | T2 to T5 | 0.045 (0.040 to 0.050)    | 0.002 | *** | <0.001 |
|                                | T3 to T4 | −0.023 (−0.027 to −0.018) | 0.002 | *** | <0.001 |
|                                | T3 to T5 | 0.016 (0.011 to 0.020)    | 0.002 | *** | <0.001 |
|                                | T4 to T5 | 0.039 (0.035 to 0.043)    | 0.001 | *** | <0.001 |
| Time × School Location (Rural) | T1 to T2 | −0.006 (−0.012 to 0.000)  | 0.002 | *   | 0.037  |
|                                | T1 to T3 | 0.022 (0.017 to 0.028)    | 0.002 | *** | <0.001 |
|                                | T1 to T4 | 0.002 (−0.004 to 0.008)   | 0.002 |     | >0.99  |
|                                | T1 to T5 | 0.039 (0.033 to 0.045)    | 0.002 | *** | <0.001 |
|                                | T2 to T3 | 0.029 (0.023 to 0.034)    | 0.002 | *** | <0.001 |
|                                | T2 to T4 | 0.008 (0.003 to 0.014)    | 0.002 | *** | <0.001 |
|                                | T2 to T5 | 0.046 (0.040 to 0.051)    | 0.002 | *** | <0.001 |
|                                | T3 to T4 | −0.020 (−0.026 to −0.015) | 0.002 | *** | <0.001 |
|                                | T3 to T5 | 0.017 (0.012 to 0.022)    | 0.002 | *** | <0.001 |
|                                | T4 to T5 | 0.037 (0.032 to 0.042)    | 0.002 | *** | <0.001 |

a = adjusted for multiple comparisons using Bonferroni correction. p-lvl (*p*-value level) \* = *p* < 0.05, \*\* = *p* < 0.01, \*\*\* = *p* < 0.001, BMI = body mass index, CI = confidence interval, WHtR = waist-to-height ratio, Mean diff = mean difference based on the estimated marginal means, p-lvl = significance level, SDS = standard deviation score, SE = standard error, T1 = baseline measurements in September 2019, T2 = follow-up measurements in June 2020, T3 = follow-up measurements in September 2020, T4 = follow-up measurements in Mar 2021, T5 = follow-up measurements in June 2021.

**Table S8.** Post hoc tests for fitness tests for the main effect time and interactions for time × sex, time × school location and time\*school grade based on the estimated marginal means.

| Variable       | Subgroups                              | Pairwise comparisons | Mean diff (95% CI)        | SE    | p-lvl | p-value <sup>a</sup> |
|----------------|----------------------------------------|----------------------|---------------------------|-------|-------|----------------------|
| 6MR SDS (DüMo) | Time                                   | T1 to T3             | 1.084 (1.000 to 1.168)    | 0.035 | ***   | <0.001               |
|                |                                        | T1 to T5             | 0.921 (0.832 to 1.010)    | 0.037 | ***   | <0.001               |
|                |                                        | T3 to T5             | −0.163 (−0.244 to −0.083) | 0.034 | ***   | <0.001               |
|                | Time × Sex (Girls)                     | T1 to T3             | 1.063 (0.945 to 1.180)    | 0.049 | ***   | <0.001               |
|                |                                        | T1 to T5             | 0.988 (0.863 to 1.112)    | 0.052 | ***   | <0.001               |
|                |                                        | T3 to T5             | −0.075 (−0.188 to 0.038)  | 0.047 |       | 0.34                 |
|                | Time × Sex (Boys)                      | T1 to T3             | 1.106 (0.986 to 1.226)    | 0.050 | ***   | <0.001               |
|                |                                        | T1 to T5             | 0.854 (0.727 to 0.981)    | 0.053 | ***   | <0.001               |
|                |                                        | T3 to T5             | −0.252 (−0.367 to −0.137) | 0.048 | ***   | <0.001               |
| SLJ SDS (DüMo) | Time                                   | T1 to T3             | −0.209 (−0.286 to −0.131) | 0.032 | ***   | <0.001               |
|                |                                        | T1 to T5             | −0.079 (−0.157 to −0.001) | 0.033 | *     | 0.047                |
|                |                                        | T3 to T5             | 0.130 (0.059 to 0.202)    | 0.030 | ***   | <0.001               |
|                | Time × School Location (Urban)         | T1 to T3             | −0.052 (−0.150 to 0.046)  | 0.041 |       | 0.62                 |
|                |                                        | T1 to T5             | 0.003 (−0.096 to 0.102)   | 0.041 |       | >0.99                |
|                |                                        | T3 to T5             | 0.055 (−0.036 to 0.146)   | 0.038 |       | 0.44                 |
|                | Time × School Location (Rural)         | T1 to T3             | −0.366 (−0.486 to −0.246) | 0.050 | ***   | <0.001               |
|                |                                        | T1 to T5             | −0.161 (−0.282 to −0.040) | 0.050 |       | 0.004                |
|                |                                        | T3 to T5             | 0.205 (0.094 to 0.316)    | 0.046 | ***   | <0.001               |
|                | Time × School Class (SY 19-20—grade 2) | T1 to T3             | −0.409 (−0.520 to −0.297) | 0.046 | ***   | <0.001               |
|                |                                        | T1 to T5             | −0.328 (−0.440 to −0.216) | 0.047 | ***   | <0.001               |
|                |                                        | T3 to T5             | 0.081 (−0.022 to 0.183)   | 0.043 |       | 0.18                 |
|                |                                        | T1 to T3             | −0.009 (−0.117 to 0.099)  | 0.045 |       | >0.99                |

|                             |                                                |          |                           |       |     |        |
|-----------------------------|------------------------------------------------|----------|---------------------------|-------|-----|--------|
| <b>MB1kg<br/>(KATS-K)</b>   | Time × School<br>Class (SY 19-<br>20—grade 3 ) | T1 to T5 | 0.170 (0.062 to 0.279)    | 0.045 | **  | 0.001  |
|                             |                                                | T3 to T5 | 0.179 (0.080 to 0.279)    | 0.041 | *** | <0.001 |
|                             | Time                                           | T1 to T3 | 0.095 (0.016 to 0.174)    | 0.033 | *   | 0.012  |
|                             |                                                | T1 to T5 | -0.023 (-0.110 to 0.063)  | 0.036 |     | >0.99  |
|                             |                                                | T3 to T5 | -0.118 (-0.194 to -0.042) | 0.032 | **  | 0.001  |
|                             | Time × Sex<br>(Girls)                          | T1 to T3 | -0.045 (-0.154 to 0.065)  | 0.045 |     | 0.98   |
|                             |                                                | T1 to T5 | -0.099 (-0.220 to 0.021)  | 0.050 |     | 0.15   |
|                             |                                                | T3 to T5 | -0.055 (-0.160 to 0.051)  | 0.044 |     | 0.64   |
|                             | Time × Sex<br>(Boys)                           | T1 to T3 | 0.234 (0.121 to 0.348)    | 0.047 | *** | <0.001 |
|                             |                                                | T1 to T5 | 0.053 (-0.073 to 0.178)   | 0.052 |     | 0.94   |
|                             |                                                | T3 to T5 | -0.182 (-0.291 to -0.073) | 0.046 | *** | <0.001 |
| <b>4 x 10 SHR<br/>(MCA)</b> | Time                                           | T1 to T3 | 0.307 (0.225 to 0.389)    | 0.034 | *** | <0.001 |
|                             |                                                | T1 to T5 | -0.357 (-0.436 to -0.277) | 0.033 | *** | <0.001 |
|                             |                                                | T3 to T5 | -0.663 (-0.742 to -0.585) | 0.033 | *** | <0.001 |
|                             | Time × School<br>Location<br>(Urban)           | T1 to T3 | 0.503 (0.399 to 0.608)    | 0.043 | *** | <0.001 |
|                             |                                                | T1 to T5 | -0.182 (-0.283 to -0.081) | 0.042 | *** | <0.001 |
|                             |                                                | T3 to T5 | -0.685 (-0.784 to -0.586) | 0.041 | *** | <0.001 |
|                             | Time × School<br>Location<br>(Rural)           | T1 to T3 | 0.111 (-0.017 to -0.238)  | 0.053 |     | 0.11   |
|                             |                                                | T1 to T5 | -0.531 (-0.654 to -0.408) | 0.051 | *** | <0.001 |
|                             |                                                | T3 to T5 | -0.641 (-0.762 to -0.521) | 0.050 | *** | <0.001 |

a = adjusted for multiple comparisons using Bonferroni correction. Mean diff = mean difference based on the estimated marginal means, CI = confidence interval, SE = standard error, p-lvl (p-value level) \* =  $p < 0.05$ , \*\* =  $p < 0.01$ , \*\*\* =  $p < 0.001$ , p-lvl = significance level, 6MR = 6 minute run, SLJ = standing long jump, MB1kg = medicine ball throw (1 kilogram), 4 x 10 SHR = 4 x 10 meter shuttle run, SDS = standard deviation score, z-value = traditional z-score standardization; DüMo = Düsseldorf Modell [2], KATS-K = Karlsruher test system [3], MCA = Motor Competence Assessment [4], SY 19-20—grade 2 = children visiting in school year 2019/20 grade 2 of primary school, SY 19-20—grade 3 = children visiting in school year 2019/20 grade 3 of primary school, T1 = baseline measurements in September 2019, T3 = follow-up measurements in September 2020, T5 = follow-up measurements in June 2021.

**Table S9.** Friedman test for weight classification and estimation of health risk using cut-offs described in AUT FIT to baseline measurements T1 and follow-up measurements T2, T3, T4, and T5.

| Variable                                  | Subgroup                    | df | X <sup>2</sup> | p-lvl | p-Value |
|-------------------------------------------|-----------------------------|----|----------------|-------|---------|
| <b>AUT weight<br/>classification</b>      | All ( $n = 708$ )           | 4  | 102.305        | ***   | <0.001  |
|                                           | Girls ( $n = 350$ )         | 4  | 19.760         | **    | 0.001   |
|                                           | Boys ( $n = 358$ )          | 4  | 94.573         | ***   | <0.001  |
|                                           | Urban schools ( $n = 424$ ) | 4  | 97.118         | *     | 0.012   |
|                                           | Rural school ( $n = 284$ )  | 4  | 12.857         | ***   | <0.001  |
| <b>WHtR estimation of<br/>health risk</b> | All ( $n = 708$ )           | 4  | 194.750        | ***   | <0.001  |
|                                           | Girls ( $n = 350$ )         | 4  | 103.406        | ***   | <0.001  |
|                                           | Boys ( $n = 358$ )          | 4  | 108.752        | ***   | <0.001  |
|                                           | Urban schools ( $n = 424$ ) | 4  | 142.724        | ***   | <0.001  |
|                                           | Rural school ( $n = 284$ )  | 4  | 72.701         | ***   | <0.001  |

$n$  = Study population, df = degrees of freedom, X<sup>2</sup> = chi-square test value, p-lvl (p-value level) \* =  $p < 0.05$ , \*\* =  $p < 0.01$ , \*\*\* =  $p < 0.001$ , p-lvl = significance level, AUT weight classification = based on Austrian reference centile curves passing through adult BMI values [1], WHtR = waist-to-height ratio, T1 = baseline measurements in September 2019, T2 = follow-up measurements in June 2020, T3 = follow-up measurements in September 2020, T4 = follow-up measurements in Mar 2021, T5 = follow-up measurements in June 2021.

**Table S10.** Post hoc analyses by the Wilcoxon test for weight classifications using Austrian cut-offs.

| Variable                  | Subgroup | Pairwise comparisons | Z <sup>a,b</sup>    | p-lvl | p-Value <sup>c</sup> |
|---------------------------|----------|----------------------|---------------------|-------|----------------------|
| AUT weight classification | All      | T1 to T2             | -3.488 <sup>a</sup> | **    | 0.005                |
|                           |          | T1 to T3             | -6.257 <sup>a</sup> | ***   | <0.001               |
|                           |          | T1 to T4             | -6.734 <sup>a</sup> | ***   | <0.001               |
|                           |          | T1 to T5             | -7.436 <sup>a</sup> | ***   | <0.001               |
|                           |          | T2 to T3             | -3.153 <sup>a</sup> | **    | 0.016                |
|                           |          | T2 to T4             | -4.388 <sup>a</sup> | ***   | <0.001               |
|                           |          | T2 to T5             | -5.039 <sup>a</sup> | ***   | <0.001               |
|                           |          | T3 to T4             | -1.692 <sup>a</sup> |       | 0.91                 |
|                           |          | T3 to T5             | -2.605 <sup>a</sup> |       | 0.09                 |
|                           |          | T4 to T5             | -1.234 <sup>a</sup> |       | >0.99                |
|                           | Girls    | T1 to T2             | -1.976 <sup>a</sup> |       | 0.48                 |
|                           |          | T1 to T3             | -3.530 <sup>a</sup> | **    | 0.004                |
|                           |          | T1 to T4             | -2.722 <sup>a</sup> |       | 0.06                 |
|                           |          | T1 to T5             | -3.618 <sup>a</sup> | **    | 0.003                |
|                           |          | T2 to T3             | -1.219 <sup>a</sup> |       | >0.99                |
|                           |          | T2 to T4             | -1.061 <sup>a</sup> |       | >0.99                |
|                           |          | T2 to T5             | -2.030 <sup>a</sup> |       | 0.42                 |
|                           |          | T3 to T4             | -0.180 <sup>b</sup> |       | >0.99                |
|                           |          | T3 to T5             | -1.029 <sup>a</sup> |       | >0.99                |
|                           |          | T4 to T5             | -1.460 <sup>a</sup> |       | >0.99                |
|                           | Boys     | T1 to T2             | -2.887 <sup>a</sup> | *     | 0.039                |
|                           |          | T1 to T3             | -5.166 <sup>a</sup> | ***   | <0.001               |
|                           |          | T1 to T4             | -6.374 <sup>a</sup> | ***   | <0.001               |
|                           |          | T1 to T5             | -6.644 <sup>a</sup> | ***   | <0.001               |
|                           |          | T2 to T3             | -3.212 <sup>a</sup> | *     | 0.013                |
|                           |          | T2 to T4             | -4.814 <sup>a</sup> | ***   | <0.001               |
|                           |          | T2 to T5             | -5.013 <sup>a</sup> | ***   | <0.001               |
|                           |          | T3 to T4             | -2.646 <sup>a</sup> |       | 0.08                 |
|                           |          | T3 to T5             | -2.694 <sup>a</sup> |       | 0.07                 |
|                           |          | T4 to T5             | -0.229 <sup>a</sup> |       | >0.99                |
|                           | Urban    | T1 to T2             | -3.414 <sup>a</sup> | **    | 0.006                |
|                           |          | T1 to T3             | -5.750 <sup>a</sup> | ***   | <0.001               |
|                           |          | T1 to T4             | -6.336 <sup>a</sup> | ***   | <0.001               |
|                           |          | T1 to T5             | -7.272 <sup>a</sup> | ***   | <0.001               |
|                           |          | T2 to T3             | -3.086 <sup>a</sup> | *     | 0.020                |
|                           |          | T2 to T4             | -4.243 <sup>a</sup> | ***   | <0.001               |
|                           |          | T2 to T5             | -5.082 <sup>a</sup> | ***   | <0.001               |
|                           |          | T3 to T4             | -1.622 <sup>a</sup> |       | >0.99                |
|                           |          | T3 to T5             | -2.655 <sup>a</sup> |       | 0.08                 |
|                           |          | T4 to T5             | -1.300 <sup>a</sup> |       | >0.99                |
|                           | Rural    | T1 to T2             | -1.091 <sup>a</sup> |       | >0.99                |
|                           |          | T1 to T3             | -2.524 <sup>a</sup> |       | 0.12                 |
|                           |          | T1 to T4             | -2.556 <sup>a</sup> |       | 0.11                 |
|                           |          | T1 to T5             | -2.535 <sup>a</sup> |       | 0.11                 |
|                           |          | T2 to T3             | -1.177 <sup>a</sup> |       | >0.99                |
|                           |          | T2 to T4             | -1.671 <sup>a</sup> |       | 0.95                 |
|                           |          | T2 to T5             | -1.715 <sup>a</sup> |       | 0.86                 |

|          |                     |       |
|----------|---------------------|-------|
| T3 to T4 | -0.655 <sup>a</sup> | >0.99 |
| T3 to T5 | -0.816 <sup>a</sup> | >0.99 |
| T4 to T5 | -0.277 <sup>a</sup> | >0.99 |

a = Based on positive ranks, b = based on negative ranks, c = adjusted for multiple comparisons using Bonferroni correction, c = based on positive ranks. Study population, n = 708; Z = test statistic; p-lvl (p-value level) \* =  $p < 0.05$ , \*\* =  $p < 0.01$ , \*\*\* =  $p < 0.001$ , p-lvl = significance level, AUT weight classification = based on Austrian reference centile curves passing through adult BMI values [1], T1 = baseline measurements in September 2019, T2 = follow-up measurements in June 2020, T3 = follow-up measurements in September 2020, T4 = follow-up measurements in Mar 2021, T5 = follow-up measurements in June 2021.

**Table S11.** Post hoc analyses by the Wilcoxon test for estimation of health risk using cut-offs described in AUT FIT.

| Variable                        | Subgroup | Pairwise comparisons | Z <sup>a,b</sup>     | p-lvl | p-Value <sup>c</sup> |
|---------------------------------|----------|----------------------|----------------------|-------|----------------------|
| WHtR, estimation of health risk | All      | T1 to T2             | -6.749 <sup>a</sup>  | ***   | <0.001               |
|                                 |          | T1 to T3             | -0.834 <sup>b</sup>  |       | >0.99                |
|                                 |          | T1 to T4             | -6.139 <sup>a</sup>  | ***   | <0.001               |
|                                 |          | T1 to T5             | -4.412 <sup>b</sup>  | ***   | <0.001               |
|                                 |          | T2 to T3             | -7.720 <sup>b</sup>  | ***   | <0.001               |
|                                 |          | T2 to T4             | -0.847 <sup>b</sup>  |       | >0.99                |
|                                 |          | T2 to T5             | -10.310 <sup>b</sup> | ***   | <0.001               |
|                                 |          | T3 to T4             | -7.506 <sup>a</sup>  | ***   | <0.001               |
|                                 |          | T3 to T5             | -4.041 <sup>b</sup>  | ***   | <0.001               |
|                                 |          | T4 to T5             | -9.798 <sup>b</sup>  | ***   | <0.001               |
|                                 | Girls    | T1 to T2             | -3.395 <sup>a</sup>  | **    | 0.007                |
|                                 |          | T1 to T3             | -3.000 <sup>b</sup>  | *     | 0.027                |
|                                 |          | T1 to T4             | -2.292 <sup>a</sup>  |       | 0.22                 |
|                                 |          | T1 to T5             | -5.431 <sup>b</sup>  | ***   | <0.001               |
|                                 |          | T2 to T3             | -5.986 <sup>b</sup>  | ***   | <0.001               |
|                                 |          | T2 to T4             | -1.457 <sup>b</sup>  |       | >0.99                |
|                                 |          | T2 to T5             | -7.665 <sup>b</sup>  | ***   | <0.001               |
|                                 |          | T3 to T4             | -5.171 <sup>a</sup>  | ***   | <0.001               |
|                                 |          | T3 to T5             | -3.086 <sup>b</sup>  | *     | 0.020                |
|                                 |          | T4 to T5             | -6.742 <sup>b</sup>  | ***   | <0.001               |
|                                 | Boys     | T1 to T2             | -6.140 <sup>a</sup>  | ***   | <0.001               |
|                                 |          | T1 to T3             | -1.982 <sup>a</sup>  |       | 0.47                 |
|                                 |          | T1 to T4             | -6.120 <sup>a</sup>  | ***   | <0.001               |
|                                 |          | T1 to T5             | -0.324 <sup>b</sup>  |       | >0.99                |
|                                 |          | T2 to T3             | -4.906 <sup>b</sup>  | ***   | <0.001               |
|                                 |          | T2 to T4             | -0.267 <sup>a</sup>  |       | >0.99                |
|                                 |          | T2 to T5             | -6.900 <sup>b</sup>  | ***   | <0.001               |
|                                 |          | T3 to T4             | -5.443 <sup>a</sup>  | ***   | <0.001               |
|                                 |          | T3 to T5             | -2.611 <sup>b</sup>  |       | 0.09                 |
|                                 |          | T4 to T5             | -7.160 <sup>b</sup>  | ***   | <0.001               |
|                                 | Urban    | T1 to T2             | -7.507 <sup>a</sup>  | ***   | <0.001               |
|                                 |          | T1 to T3             | -1.540 <sup>a</sup>  |       | >0.99                |
|                                 |          | T1 to T4             | -6.724 <sup>a</sup>  | ***   | <0.001               |
|                                 |          | T1 to T5             | -0.866 <sup>b</sup>  |       | >0.99                |
|                                 |          | T2 to T3             | -6.496 <sup>b</sup>  | ***   | <0.001               |
|                                 |          | T2 to T4             | -1.116 <sup>b</sup>  |       | >0.99                |
|                                 |          | T2 to T5             | -8.273 <sup>b</sup>  | ***   | <0.001               |

|       |          |                     |     |        |
|-------|----------|---------------------|-----|--------|
| Rural | T3 to T4 | -5.580 <sup>a</sup> | *** | <0.001 |
|       | T3 to T5 | -2.480 <sup>b</sup> |     | 0.13   |
|       | T4 to T5 | -7.506 <sup>b</sup> | *** | <0.001 |
|       | T1 to T2 | -1.483 <sup>a</sup> |     | >0.99  |
|       | T1 to T3 | -2.967 <sup>b</sup> | *   | 0.030  |
|       | T1 to T4 | -1.511 <sup>a</sup> |     | >0.99  |
|       | T1 to T5 | -5.397 <sup>b</sup> | *** | <0.001 |
|       | T2 to T3 | -4.243 <sup>b</sup> | *** | <0.001 |
|       | T2 to T4 | 0.000               |     | >0.99  |
|       | T2 to T5 | -6.194 <sup>b</sup> | *** | <0.001 |
|       | T3 to T4 | -5.145 <sup>a</sup> | *** | <0.001 |
|       | T3 to T5 | -3.402 <sup>b</sup> | **  | 0.007  |
|       | T4 to T5 | -6.303 <sup>b</sup> | *** | <0.001 |

a = Based on positive ranks, b = based on negative ranks, c = adjusted for multiple comparisons using Bonferroni correction, c = based on positive ranks. Study population, n = 708; Z = test statistic; p-lvl (p-value level) \* =  $p < 0.05$ , \*\* =  $p < 0.01$ , \*\*\* =  $p < 0.001$ , p-lvl = significance level, WHtR = waist-to-height ratio, T1 = baseline measurements in September 2019, T2 = follow-up measurements in June 2020, T3 = follow-up measurements in September 2020, T4 = follow-up measurements in Mar 2021, T5 = follow-up measurements in June 2021.

**Table S12.** Overview of fitness test STA9 classifications in relation to the results of international reference values.

| Fitness performance | STA9 Classification, 6MR (DüMo), No. (%) (n = 706) |                     |                     | STA9 Classification, SLJ (DüMo), No. (%) (n = 706) |                     |                     | STA9 Classification, MB1kg (KATS-K), No. (%) (n = 662) |                     |                     | STA9 Classification, 4 x 10 SHR (MCA), No. (%) (n = 706) |                     |                     |
|---------------------|----------------------------------------------------|---------------------|---------------------|----------------------------------------------------|---------------------|---------------------|--------------------------------------------------------|---------------------|---------------------|----------------------------------------------------------|---------------------|---------------------|
|                     | T1                                                 | T3                  | T5                  | T1                                                 | T3                  | T5                  | T1                                                     | T3                  | T5                  | T1                                                       | T3                  | T5                  |
| Poor                | 28<br>(4.0%)<br>)                                  | 116<br>(16.4%)<br>) | 120<br>(17.0%)<br>) | 44<br>(6.2%)<br>)                                  | 33<br>(4.7%)<br>)   | 46<br>(6.5%)<br>)   | 33<br>(5.0%)<br>)                                      | 31<br>(4.7%)<br>)   | 25<br>(3.8%)<br>)   | 76<br>(10.8%)<br>)                                       | 138<br>(19.5%)<br>) | 61<br>(8.6%)<br>)   |
| Very weak           | 34<br>(4.8%)<br>)                                  | 123<br>(17.4%)<br>) | 95<br>(13.5%)<br>)  | 40<br>(5.7%)<br>)                                  | 34<br>(4.8%)<br>)   | 45<br>(6.4%)<br>)   | 49<br>(7.4%)<br>)                                      | 64<br>(9.7%)<br>)   | 50<br>(7.6%)<br>)   | 103<br>(14.6%)<br>)                                      | 136<br>(19.3%)<br>) | 60<br>(8.5%)<br>)   |
| Weak                | 81<br>(11.5%)<br>)                                 | 151<br>(21.4%)<br>) | 118<br>(16.7%)<br>) | 99<br>(14.0%)<br>)                                 | 68<br>(9.6%)<br>)   | 81<br>(11.5%)<br>)  | 94<br>(14.2%)<br>)                                     | 97<br>(14.7%)<br>)  | 94<br>(14.2%)<br>)  | 118<br>(16.7%)<br>)                                      | 144<br>(20.4%)<br>) | 93<br>(13.2%)<br>)  |
| Below average       | 99<br>(14.0%)<br>)                                 | 124<br>(17.6%)<br>) | 127<br>(18.0%)<br>) | 141<br>(20.0%)<br>)                                | 130<br>(18.4%)<br>) | 133<br>(18.8%)<br>) | 137<br>(20.7%)<br>)                                    | 141<br>(21.3%)<br>) | 133<br>(20.1%)<br>) | 157<br>(22.2%)<br>)                                      | 119<br>(16.9%)<br>) | 133<br>(18.8%)<br>) |
| Average             | 104<br>(14.7%)<br>)                                | 95<br>(13.5%)<br>)  | 101<br>(14.3%)<br>) | 110<br>(15.6%)<br>)                                | 130<br>(18.8%)<br>) | 118<br>(16.7%)<br>) | 132<br>(19.9%)<br>)                                    | 144<br>(21.8%)<br>) | 145<br>(21.9%)<br>) | 135<br>(19.1%)<br>)                                      | 88<br>(12.5%)<br>)  | 149<br>(21%)<br>)   |
| Above average       | 116<br>(16.4%)<br>)                                | 62<br>(8.8%)<br>)   | 77<br>(10.9%)<br>)  | 113<br>(16.0%)<br>)                                | 130<br>(18.8%)<br>) | 114<br>(16.1%)<br>) | 105<br>(15.9%)<br>)                                    | 96<br>(14.5%)<br>)  | 109<br>(16.5%)<br>) | 72<br>(10.2%)<br>)                                       | 52<br>(7.4%)<br>)   | 110<br>(15.6%)<br>) |

|                    |                |              |              |               |               |               |              |              |              |              |              |              |
|--------------------|----------------|--------------|--------------|---------------|---------------|---------------|--------------|--------------|--------------|--------------|--------------|--------------|
| <b>Very well</b>   | 109<br>(15.4%) | 25<br>(3.5%) | 38<br>(5.4%) | 80<br>(11.3%) | 82<br>(11.6%) | 86<br>(12.2%) | 61<br>(9.2%) | 47<br>(7.1%) | 43<br>(6.5%) | 34<br>(4.8%) | 21<br>(3.0%) | 66<br>(9.3%) |
| <b>Excellent</b>   | 70<br>(9.9%)   | 9 (1.3)      | 21<br>(3.0%) | 53<br>(7.5%)  | 53<br>(7.5%)  | 50<br>(7.1%)  | 36<br>(5.4%) | 22<br>(3.3%) | 41<br>(6.2%) | 10<br>(1.4%) | 6<br>(0.8%)  | 24<br>(3.4%) |
| <b>Outstanding</b> | 65<br>(9.2%)   | 1<br>(0.1%)  | 9<br>(1.3%)  | 26<br>(3.7%)  | 40<br>(5.7%)  | 33<br>(4.7%)  | 15<br>(2.3%) | 20<br>(3.0%) | 22<br>(3.3%) | 1<br>(0.1%)  | 2<br>(0.3%)  | 10<br>(1.4%) |

Data are No (%), 6MR DüMo = Ra. of 6 minute run by u.STA9 based on reference values from the Düsseldorf Modell [2], SLJ DüMo = Ra. of standing long jump by u.STA9 based on reference values from the Düsseldorf Modell [2], MB1kg KATS-K = Ra. of medicine ball throw 1 kg by u.STA9 based on reference values from the Karlsruher test system [3], 4-m × 10-m SHR MCA = Ra. of 4-m × 10-m shuttle run by u.STA9 based on Portuguese reference values [4], m = meter, u.STA9 = using a nine-point scale, Ra. = Ranking, *n* = number of participations, T1 = baseline measurements in September 2019, T3 = follow-up measurements in September 2020, T5 = follow-up measurements in June 2021.

**Table S13.** Friedman test for fitness performance categories using cut-offs described in AUT FIT to baseline measurements T1 and follow-up measurements T3 and T5.

| Variable                                      | Subgroup                           | df | X <sup>2</sup> | p-lvl | p-Value |
|-----------------------------------------------|------------------------------------|----|----------------|-------|---------|
| STA9 Classification, 6MR (DüMo)               | All ( <i>n</i> = 706)              | 2  | 598.451        | ***   | <0.001  |
|                                               | Girls ( <i>n</i> = 349)            | 2  | 299.961        | ***   | <0.001  |
|                                               | Boys ( <i>n</i> = 357)             | 2  | 302.576        | ***   | <0.001  |
|                                               | Urban schools ( <i>n</i> = 423)    | 2  | 347.021        | ***   | <0.001  |
|                                               | Rural school ( <i>n</i> = 283)     | 2  | 253.492        | ***   | <0.001  |
|                                               | SY 19-20—grade 2 ( <i>n</i> = 345) | 2  | 239.289        | ***   | <0.001  |
|                                               | SY 19-20—grade 3 ( <i>n</i> = 361) | 2  | 367.385        | ***   | <0.001  |
| STA9 Classification, SLJ (DüMo)               | All ( <i>n</i> = 706)              | 2  | 36.183         | ***   | <0.001  |
|                                               | Girls ( <i>n</i> = 349)            | 2  | 25.458         | ***   | <0.001  |
|                                               | Boys ( <i>n</i> = 357)             | 2  | 12.624         | **    | 0.002   |
|                                               | Urban schools ( <i>n</i> = 423)    | 2  | 5.245          |       | 0.07    |
|                                               | Rural school ( <i>n</i> = 283)     | 2  | 48.852         | ***   | <0.001  |
|                                               | SY 19-20—grade 2 ( <i>n</i> = 345) | 2  | 63.186         | ***   | <0.001  |
|                                               | SY 19-20—grade 3 ( <i>n</i> = 361) | 2  | 30.481         | ***   | <0.001  |
| STA9 Classification, MB1kg (KATS-K)           | All ( <i>n</i> = 662)              | 2  | 12.063         | **    | 0.002   |
|                                               | Girls ( <i>n</i> = 330)            | 2  | 3.067          |       | 0.22    |
|                                               | Boys ( <i>n</i> = 332)             | 2  | 21.230         | ***   | <0.001  |
|                                               | Urban schools ( <i>n</i> = 394)    | 2  | 6.936          |       | 0.03    |
|                                               | Rural school ( <i>n</i> = 268)     | 2  | 7.136          | *     | 0.028   |
|                                               | SY 19-20—grade 2 ( <i>n</i> = 344) | 2  | 0.185          |       | 0.91    |
|                                               | SY 19-20—grade 3 ( <i>n</i> = 318) | 2  | 25.502         | ***   | <0.001  |
| STA9 Classification, 4-m × 10-m SHR SDS (MCA) | All ( <i>n</i> = 706)              | 2  | 285.022        | ***   | <0.001  |
|                                               | Girls ( <i>n</i> = 349)            | 2  | 167.663        | ***   | <0.001  |
|                                               | Boys ( <i>n</i> = 357)             | 2  | 121.553        | ***   | <0.001  |
|                                               | Urban schools ( <i>n</i> = 423)    | 2  | 194.778        | ***   | <0.001  |
|                                               | Rural school ( <i>n</i> = 283)     | 2  | 110.433        | ***   | <0.001  |
|                                               | SY 19-20—grade 2 ( <i>n</i> = 345) | 2  | 104.484        | ***   | <0.001  |
|                                               | SY 19-20—grade 3 ( <i>n</i> = 361) | 2  | 190.197        | ***   | <0.001  |

*n* = Study population, df = degrees of freedom, X<sup>2</sup> = chi-square test value, p-lvl (*p*-value level) \* = *p* < 0.05, \*\* = *p* < 0.01, \*\*\* = *p* < 0.001, p-lvl = significance level, 6MR DüMo = Ra. of 6 minute run by u.STA9 based on reference values from the Düsseldorf Modell [2], SLJ DüMo = Ra. of standing long jump by u.STA9 based on reference values from the Düsseldorf Modell [2], MB1kg KATS-K = Ra. of medicine ball throw 1 kg by u.STA9 based on reference values from the Karlsruher test system [3], 4-m × 10-m SHR MCA = Ra. of 4-m × 10-m shuttle run by u.STA9 based on Portuguese reference values

[4], u.STA9 = using a nine-point scale, Ra. = Ranking, *n* = number of participations, SY 19-20—grade 2 = children visiting in school year 2019/20 grade 2 of primary school, SY 19-20—grade 3 = children visiting in school year 2019/20 grade 3 of primary school, m = meter, T1 = baseline measurements in September 2019, T3 = follow-up measurements in September 2020, T5 = follow-up measurements in June 2021.

**Table S14.** Post hoc analyses by the Wilcoxon test for fitness tests using cut-offs described in AUT FIT.

| Variable                                         | Subgroup         | Pairwise comparisons | Z <sup>a,b</sup>     | p-lvl | p-Value <sup>c</sup> |
|--------------------------------------------------|------------------|----------------------|----------------------|-------|----------------------|
| <b>STA9 Classification, 6MR (DüMo)</b>           | All              | T1 to T3             | -20.230 <sup>a</sup> | ***   | <0.001               |
|                                                  |                  | T1 to T5             | -17.810 <sup>a</sup> | ***   | <0.001               |
|                                                  |                  | T3 to T5             | -5.302 <sup>b</sup>  | ***   | <0.001               |
| <b>STA9 Classification, SLJ (DüMo)</b>           | All              | T1 to T3             | -4.765 <sup>a</sup>  | ***   | <0.001               |
|                                                  |                  | T1 to T5             | -1.197 <sup>a</sup>  |       | 0.69                 |
|                                                  |                  | T3 to T5             | -4.397 <sup>b</sup>  | ***   | <0.001               |
|                                                  | Urban            | T1 to T3             | -0.728 <sup>a</sup>  |       | >0.99                |
|                                                  |                  | T1 to T5             | -0.585 <sup>b</sup>  |       | >0.99                |
|                                                  |                  | T3 to T5             | -1.756 <sup>b</sup>  |       | 0.24                 |
|                                                  | Rural            | T1 to T3             | -6.406 <sup>a</sup>  | ***   | <0.001               |
|                                                  |                  | T1 to T5             | -2.520 <sup>a</sup>  | *     | 0.035                |
|                                                  |                  | T3 to T5             | -4.628 <sup>b</sup>  | ***   | <0.001               |
|                                                  | SY 19-20—grade 2 | T1 to T3             | -7.113 <sup>a</sup>  | ***   | <0.001               |
|                                                  |                  | T1 to T5             | -5.877 <sup>a</sup>  | ***   | <0.001               |
|                                                  |                  | T3 to T5             | -1.770 <sup>b</sup>  |       | 0.23                 |
|                                                  | SY 19-20—grade 3 | T1 to T3             | -0.755 <sup>a</sup>  |       | >0.99                |
|                                                  |                  | T1 to T5             | -4.533 <sup>a</sup>  | ***   | <0.001               |
|                                                  |                  | T3 to T5             | -4.491 <sup>a</sup>  | ***   | <0.001               |
| <b>STA9 Classification, MB1kg (KATS-K)</b>       | All              | T1 to T3             | -2.617 <sup>a</sup>  | *     | 0.027                |
|                                                  |                  | T1 to T5             | -0.935 <sup>b</sup>  |       | >0.99                |
|                                                  |                  | T3 to T5             | -3.725 <sup>b</sup>  | ***   | <0.001               |
|                                                  | Girls            | T1 to T3             | -0.790 <sup>a</sup>  |       | >0.99                |
|                                                  |                  | T1 to T5             | -2.163 <sup>a</sup>  |       | 0.09                 |
|                                                  |                  | T3 to T5             | -1.711 <sup>a</sup>  |       | 0.26                 |
|                                                  | Boys             | T1 to T3             | -4.507 <sup>a</sup>  | ***   | <0.001               |
|                                                  |                  | T1 to T5             | -0.962 <sup>a</sup>  |       | >0.99                |
|                                                  |                  | T3 to T5             | -3.582 <sup>b</sup>  | **    | 0.001                |
| <b>STA9 Classification, 4-m × 10-m SHR (MCA)</b> | All              | T1 to T3             | -8.720 <sup>a</sup>  | ***   | <0.001               |
|                                                  |                  | T1 to T5             | -9.111 <sup>b</sup>  | ***   | <0.001               |
|                                                  |                  | T3 to T5             | -15.914 <sup>b</sup> | ***   | <0.001               |
|                                                  | Urban            | T1 to T3             | -9.775 <sup>a</sup>  | ***   | <0.001               |
|                                                  |                  | T1 to T5             | -4.412 <sup>b</sup>  | ***   | <0.001               |
|                                                  |                  | T3 to T5             | -12.489 <sup>b</sup> | ***   | <0.001               |
|                                                  | Rural            | T1 to T3             | -1.637 <sup>a</sup>  |       | 0.31                 |
|                                                  |                  | T1 to T5             | -8.642 <sup>b</sup>  | ***   | <0.001               |
|                                                  |                  | T3 to T5             | -9.878 <sup>b</sup>  | ***   | <0.001               |

a = Based on positive ranks, b = based on negative ranks, c = adjusted for multiple comparisons using Bonferroni correction, c = based on positive ranks. Study population, *n* = 708; Z = test statistic; p-lvl (*p*-value level) \* = *p* < 0.05, \*\* = *p* < 0.01, \*\*\* = *p* < 0.001, p-lvl = significance level, 6MR DüMo = Ra. of 6 minute run by u.STA9 based on reference values from the Düsseldorf Modell [2], SLJ DüMo = Ra. of standing long jump by u.STA9 based on reference values from the Düsseldorf Modell [2], MB1kg KATS-K = Ra. of medicine ball throw 1 kg by u.STA9 based on reference values from the Karlsruher test system [3], 4-m × 10-m SHR MCA = Ra. of 4-m × 10-m shuttle run by u.STA9 based on Portuguese

reference values [4], u.STA9 = using a nine-point scale, Ra. = Ranking, n = number of participations, SY 19-20—grade 2 = children visiting in school year 2019/20 grade 2 of primary school, SY 19-20—grade 3 = children visiting in school year 2019/20 grade 3 of primary school, m = meter, T1 = baseline measurements in September 2019, T3 = follow-up measurements in September 2020, T5 = follow-up measurements in June 2021.

**Figure S1.** COVID-19 restrictions in Austria between January 31, 2020 and June 30, 2021.

**A.** Restriction levels for primary school children.

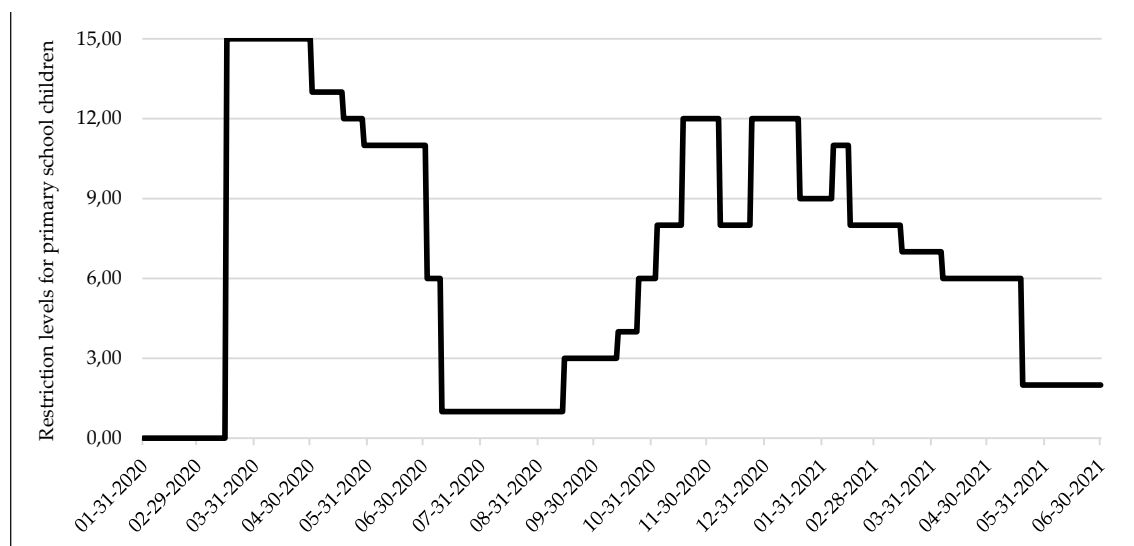

**B.** OxCGRT Stringency Index.

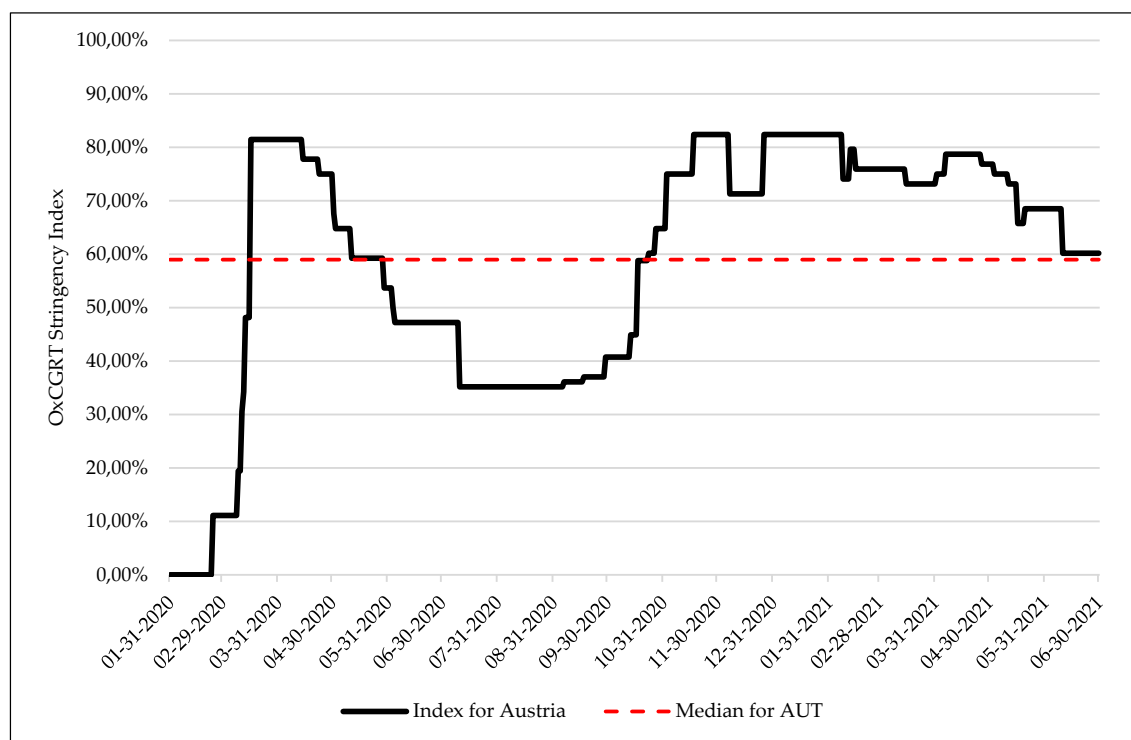

The detailed description of this classification method used in Figure S1A is available in Table S1 and Table S2. Figure S1B shows the Oxford COVID-19 Government Response Tracker (OxCGRT) Stringency Index for Austria between January 31, 2020 and June 30, 2021.

## References

1. Mayer, M.; Gleiss, A.; Häusler, G.; Borkenstein, M.; Kapelari, K.; Köstl, G.; Lassi, M.; Schemper, M.; Schmitt, K.; Blümel, P. Weight and body mass index (BMI): current data for Austrian boys and girls aged 4 to under 19 years. *Ann. Hum. Biol.* **2015**, *42*, 45–55, doi:10.3109/03014460.2014.907444.
2. Stemper, T.; Bachmann, C.; Diehlmann, K.; Kemper, B. *DüMo Düsseldorfer Modell der Bewegungs-, Sport- und Talentförderung: 2003 - 2018: Konzept, Normwerte, Untersuchungsergebnisse*; LIT: Berlin, 2020, ISBN 9783643147783.
3. Bös, K.; Opper, E.; Woll, A.; Liebisch, R.; Breithecker, D.; Kremer, B. Das Karlsruher Testsystem für Kinder (KATS-K) - Testmanual. *Haltung und Bewegung* **2001**, *21*, 4.
4. Rodrigues, L.P.; Luz, C.; Cordovil, R.; Bezerra, P.; Silva, B.; Camões, M.; Lima, R. Normative values of the motor competence assessment (MCA) from 3 to 23 years of age. *J. Sci. Med. Sport* **2019**, *22*, 1038–1043, doi:10.1016/j.jsams.2019.05.009.
